# Supplementary material
Source: MDPI journal article supplement (https://www.mdpi.com/2311-7524/9/1/70)
Supplement: s1 [file s1]

## Supplementary Materials:

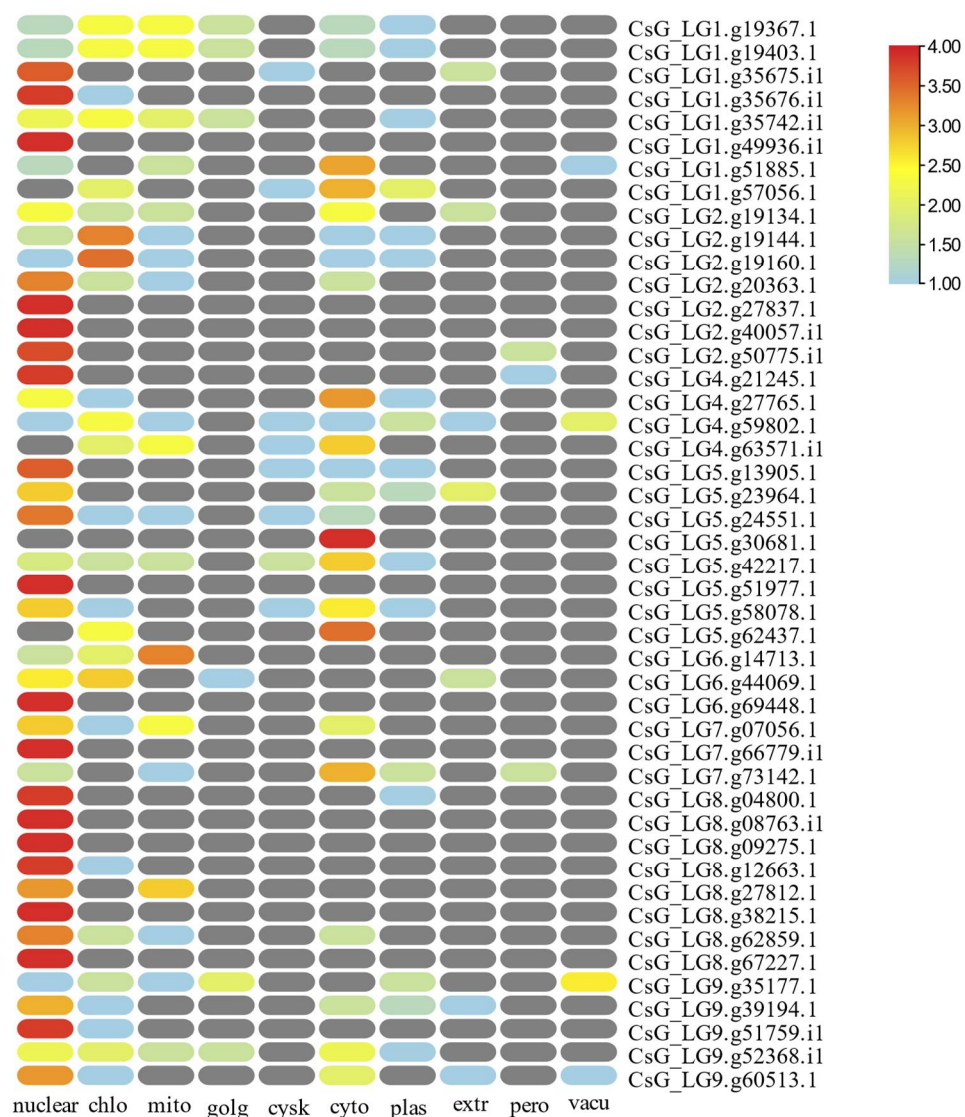

**Figure S1.** Heat map of predicted subcellular location of *CsNF-Ys*.

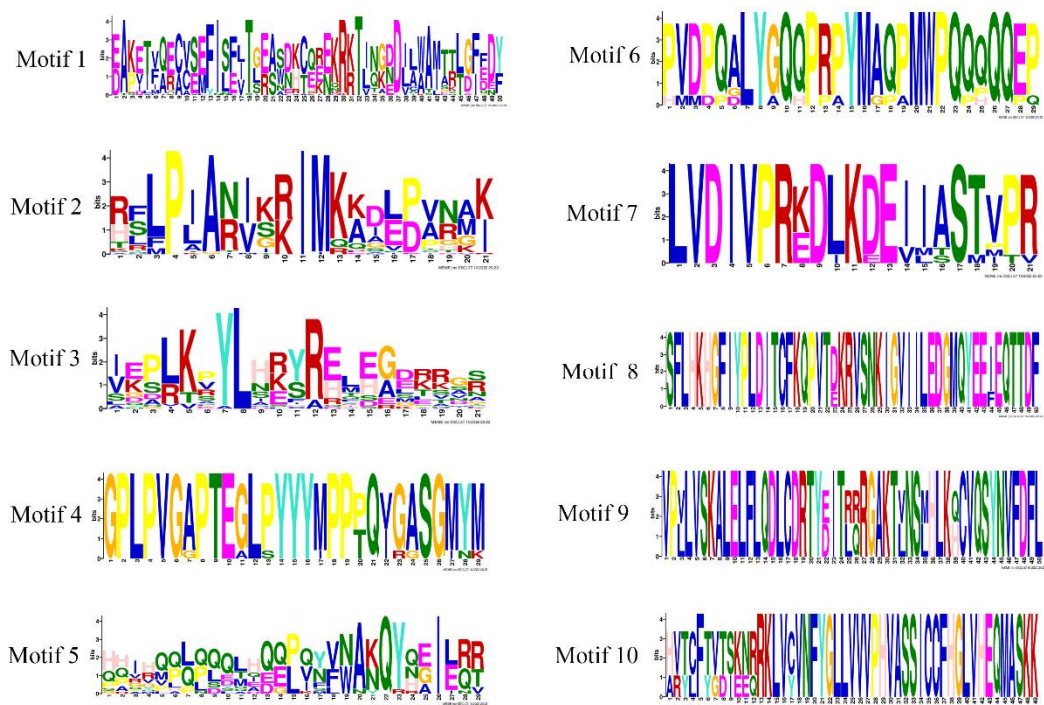

**Figure S2.** Details of 10 Motifs of CsNF-Y family genes

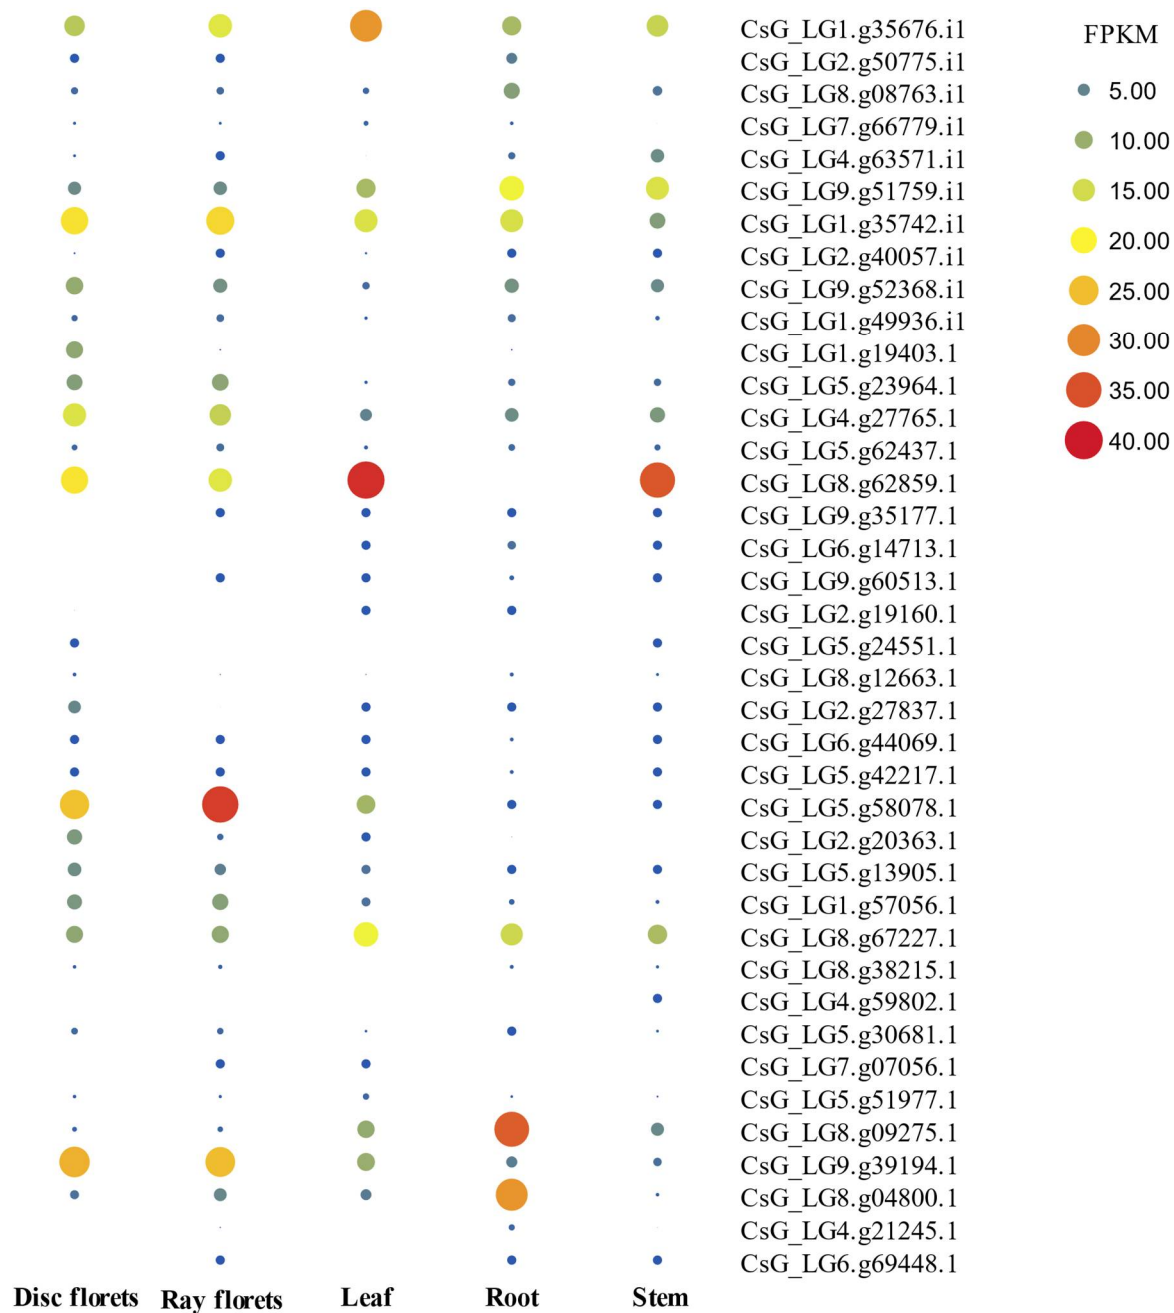

Figure S3. Expression patterns of *CsNF-Y* genes in five chrysanthemum organs.

**Table S1.** Ka/Ks ratios of tandemly and segmentally duplicated *CsNF-Ys*.

| No. | Seq_1 Gene ID     | Seq_2 Gene ID    | Ka              | Ks              | Ka/Ks           | EffectiveLen | Average S-sites | Average N-sites |
|-----|-------------------|------------------|-----------------|-----------------|-----------------|--------------|-----------------|-----------------|
| 1   | CsG_LG1.g49936.il | CsG_LG6.g69448.1 | 0.1517<br>60989 | 0.8622<br>55824 | 0.1760<br>04597 | 519          | 113.83          | 405.17          |
| 2   | CsG_LG2.g40057.il | CsG_LG8.g04800.1 | 0.1760<br>91858 | 0.6443<br>49239 | 0.2732<br>86359 | 753          | 170             | 583             |

**Table S 2.** Primers sequences used in this study.

| Primer name            | Sequence (5'-3')         |
|------------------------|--------------------------|
| CsEF1a-RT-F            | AGACGATCTGGAAAGGAGATAGAG |
| CsEF1a-RT-R            | TCATGTCACGCACAGCAAAC     |
| CsG_LG8.g04800.1-RT-F  | CAGGTATGAAGCGTGTGAAT     |
| CsG_LG8.g04800.1-RT-R  | CCACTGCTGTCCTAAAGAAG     |
| CsG_LG9.g39194.1-RT-F  | ACTATATGCCTCCACCACAA     |
| CsG_LG9.g39194.1-RT-R  | GGTTCTTGTTGTTGCTGTTG     |
| CsG_LG8.g09275.1-RT-F  | AGACTCAAGAACTCAACCC      |
| CsG_LG8.g09275.1-RT-R  | ATCTGTTTTCTTGCTGGTGG     |
| CsG_LG8.g67227.1-RT-F  | ATGGGGAATAATGGAGGGGG     |
| CsG_LG8.g67227.1-RT-R  | CCGAACCCATTTTACCACTC     |
| CsG_LG5.g13905.1-RT-F  | ATCAACAAGACCAGGGGCAG     |
| CsG_LG5.g13905.1-RT-R  | TGAAGGAAGACCCACCGACT     |
| CsG_LG5.g58078.1-RT-F  | CCCTATCCTCCAAACCAAAT     |
| CsG_LG5.g58078.1-RT-R  | TTGCTGGTGAATGTGCTGAT     |
| CsG_LG8.g62859.1-RT-F  | CCACCTTACCAACATCTCCTCCAA |
| CsG_LG8.g62859.1-RT-R  | AAGATAGGTGCCTCGGCTGAA    |
| CsG_LG4.g27765.1-RT-F  | CGTATTACTATATGCCTCCACCA  |
| CsG_LG4.g27765.1-RT-R  | GTTCTTGTTGTTGCTGTTGTG    |
| CsG_LG5.g23964.1-RT-F  | TTGGGGCTTCAGGGATGTAT     |
| CsG_LG5.g23964.1-RT-R  | TGTGGTTCTTGTTGTTGCTG     |
| CsG_LG1.g19403.1-RT-F  | TAACTACGGTGACGAAGAC      |
| CsG_LG1.g19403.1-RT-R  | GTAAGTAGATGATGCTCCAG     |
| CsG_LG9.g52368.i1-RT-F | CTGCCATACAACCGCCTACT     |
| CsG_LG9.g52368.i1-RT-R | CACCACTAATGAACCACCACTACT |
| CsG_LG1.g35742.i1-RT-F | ACCACCACAAGAACCACAG      |
| CsG_LG1.g35742.i1-RT-R | GACCAACCAGGATACTCACTT    |
| CsG_LG9.g51759.i1-RT-F | GGTGAAACAAATGGGGTAAT     |
| CsG_LG9.g51759.i1-RT-R | CTTGTTTGCTTGTTGATGC      |
| CsG_LG8.g08763.i1-RT-F | TCTGCTGCTTATGGACCTCAA    |
| CsG_LG8.g08763.i1-RT-R | CGCCTGATTATTCCGTGATACTG  |
| CsG_LG1.g35676.i1-RT-F | TAGTGAAAGTGAGAACCAGC     |
| CsG_LG1.g35676.i1-RT-R | CTGAGTTGGGTATTGGATGT     |
| CsG_LG1.g49936.i1-RT-F | CAACCTGATTATCGTGAACA     |
| CsG_LG1.g49936.i1-RT-R | CCTTGCATCTGAACCATC       |
| CsG_LG2.g40057.i1-RT-F | GGCAGGTATGATAATGGAGATA   |
| CsG_LG2.g40057.i1-RT-R | GCGATGTCTGGTTGGATG       |
| CsG_LG2.g20363.1-RT-F  | TCAAACAAGCCTATGATGGA     |
| CsG_LG2.g20363.1-RT-R  | CTATGAATCCGAAGGTGACT     |
| CsG_LG1.g57056.1-RT-F  | TCATCTGTCGTTGGTAAGC      |
| CsG_LG1.g57056.1-RT-R  | TCGGTAGTCGGTACTTCTT      |
